# Supplementary material for: Drug Loaded 3D-Printed Poly(ε-Caprolactone) Scaffolds for Local Antibacterial or Anti-Inflammatory Treatment in Bone Regeneration
Source: MDPI journal article supplement (doi:10.3390/polym15193957), 2023-09-30
Supplement: s1 [file s1]

# Drug Loaded 3D-Printed Poly( $\epsilon$ -Caprolactone) Scaffolds for Local Antibacterial or Anti-Inflammatory Treatment in Bone Regeneration

Mariia Stepanova <sup>1</sup>, Ilia Averianov <sup>1</sup>, Iosif Goffman <sup>1</sup>, Natalia Shevchenko <sup>1</sup>, Artem Rubinstein <sup>2</sup>, Tatiana Egorova <sup>3</sup>, Andrey Trulioff <sup>2</sup>, Yulia Naschekina <sup>4</sup>, Igor Kudryavtsev <sup>2,5</sup>, Elena Demyanova <sup>3</sup>, Evgenia Korzhikova-Vlakh <sup>1</sup> and Viktor Korzhikov-Vlakh <sup>1,6\*</sup>

<sup>1</sup> Institute of Macromolecular Compounds, Russian Academy of Sciences, 199004 St. Petersburg, Russia; [maristepanova@hq.macro.ru](mailto:maristepanova@hq.macro.ru) (M.S.), [averianovilia@gmail.com](mailto:averianovilia@gmail.com) (I.A.), [goffman@imc.macro.ru](mailto:goffman@imc.macro.ru) (I.V.), [natali.shevchenko29@gmail.com](mailto:natali.shevchenko29@gmail.com) (N.S.), [vlakh@hq.macro.ru](mailto:vlakh@hq.macro.ru) (E.K.-V.)

<sup>2</sup> Institute of Experimental Medicine, 197376 St. Petersburg, Russia; [arrubin6@mail.ru](mailto:arrubin6@mail.ru) (A.R.), [trulioff@gmail.com](mailto:trulioff@gmail.com) (A.T.)

<sup>3</sup> State Research Institute of Highly Pure Biopreparations FMBA of Russia, 197110, St. Petersburg, Russia; [egorova25tat@yandex.ru](mailto:egorova25tat@yandex.ru) (T.E.), [lenna\\_22@mail.ru](mailto:lenna_22@mail.ru) (E.D.)

<sup>4</sup> Institute of Cytology, Russian Academy of Sciences, St. Petersburg 194064, Russia; [ulychka@mail.ru](mailto:ulychka@mail.ru) (Yu.N.)

<sup>5</sup> School of Biomedicine, Far Eastern Federal University, 10 Ajax Bay, Russky Island, 690922 Vladivostok, Russia; [igorek1981@yandex.ru](mailto:igorek1981@yandex.ru) (I.K.)

<sup>6</sup> Institute of Chemistry, Saint-Petersburg State University, 198504 St. Petersburg, Russia;

\* Correspondence: [v.korzhikov-vlakh@spbu.ru](mailto:v.korzhikov-vlakh@spbu.ru)

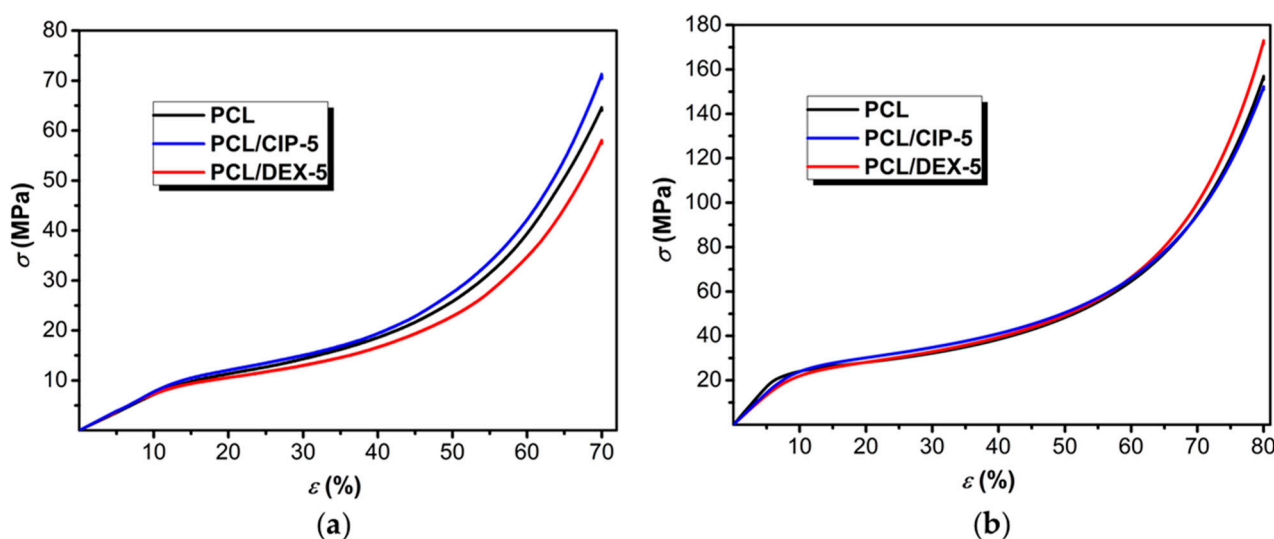

**Figure S1.** Compression stress-strain curves for 3D-printed (a) and monolithic (b) PCL specimens and its composites.

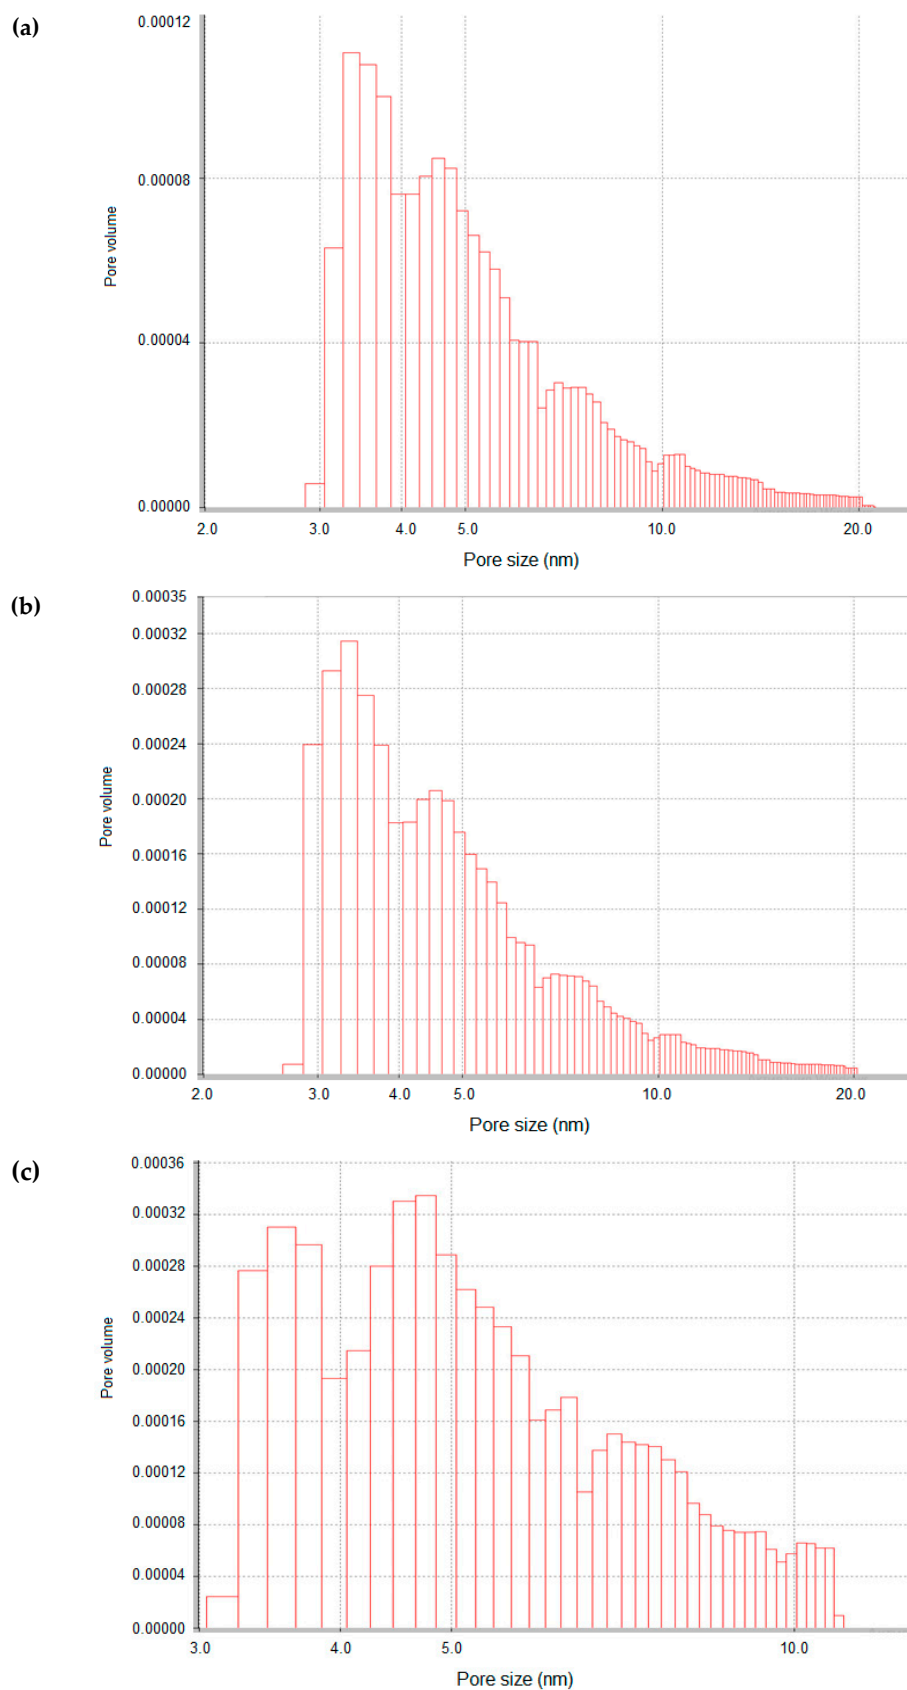

**Figure S2.** Pore size distribution of different 3D-printed scaffolds (BET):  
(a) PCL; (b) PCL/CIP-1; (c) PCL/CIP-5.

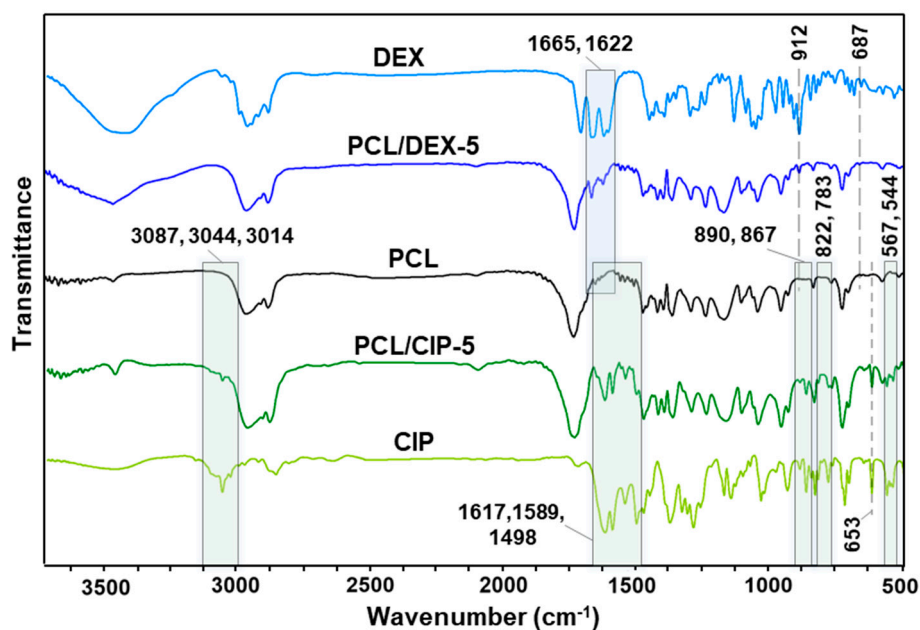

**Figure S3.** FTIR spectra of 3D-printed composite matrices with 5 wt% DEX (PCL/DEX-5) or CIP (PCL/CIP-5), as well as pristine PCL matrix and filler drugs.

**Table S1.** Correlation coefficients and calculated parameters with different mathematical models of release.

| Model            | Correlation coefficients and parameters | CIP                  |                      |                      |                      |                      | DEX                  |                      |                      |                      |                      |
|------------------|-----------------------------------------|----------------------|----------------------|----------------------|----------------------|----------------------|----------------------|----------------------|----------------------|----------------------|----------------------|
|                  |                                         | PB                   |                      | PB+Lipase            |                      |                      | PB                   |                      | PB+Lipase            |                      |                      |
|                  |                                         | 1 %                  | 5 %                  | 1 %                  | 5 %                  | 0.5 %                | 1 %                  | 5 %                  | 0.5 %                | 1 %                  | 5 %                  |
| Zero-order       | $R^2$                                   | 0.9805               | 0.9802               | 0.9579               | 0.9779               | 0.8616               | 0.9071               | 0.9290               | 0.8747               | 0.9689               | 0.9879               |
|                  | $k_0$                                   | 1.62                 | 1.10                 | 2.23                 | 1.15                 | 0.23                 | 1.91                 | 0.83                 | 0.26                 | 2.56                 | 0.96                 |
| First-order      | $R^2$                                   | <b>0.9905</b>        | 0.9875               | 0.9761               | 0.9848               | 0.9055               | 0.9417               | 0.9345               | 0.9248               | <b>0.9917</b>        | <b>0.9924</b>        |
|                  | $k_1$                                   | 0.02                 | 0.01                 | 0.03                 | 0.01                 | 0.003                | 0.03                 | 0.01                 | 0.004                | 0.04                 | 0.01                 |
| Higuchi          | $R^2$                                   | <b>0.9903</b>        | <b>0.9915</b>        | <b>0.9903</b>        | <b>0.9962</b>        | 0.9726               | 0.9819               | 0.9770               | 0.9776               | <b>0.9984</b>        | 0.9880               |
|                  | $k_H$                                   | 7.48                 | 5.06                 | 10.67                | 5.41                 | 3.20                 | 9.35                 | 4.03                 | 3.70                 | 12.18                | 4.46                 |
| Korsmeyer-Peppas | $R^2$                                   | <b>0.9933</b>        | <b>0.9948</b>        | <b>0.9901</b>        | <b>0.9978</b>        | <b>0.9965</b>        | 0.9896               | 0.9808               | <b>0.9971</b>        | <b>0.9986</b>        | <b>0.9963</b>        |
|                  | $k_{KP}$                                | 4.415                | 3.023                | 11.600               | 4.447                | 8.488                | 12.455               | 6.163                | 9.179                | 10.730               | 2.608                |
|                  | $n$                                     | 0.68                 | 0.68                 | 0.47                 | 0.56                 | 0.30                 | 0.41                 | 0.34                 | 0.31                 | 0.55                 | 0.68                 |
| Hixon-Crowell    | $R^2$                                   | 0.9833               | 0.9827               | 0.9616               | 0.9743               | 0.8915               | 0.9312               | 0.9328               | 0.9095               | 0.9869               | <b>0.9911</b>        |
|                  | $k_{HC}$                                | $7.0 \times 10^{-3}$ | $4.0 \times 10^{-3}$ | $1.1 \times 10^{-3}$ | $5.0 \times 10^{-3}$ | $9.7 \times 10^{-3}$ | $8.0 \times 10^{-3}$ | $3.0 \times 10^{-3}$ | $1.2 \times 10^{-3}$ | $1.2 \times 10^{-2}$ | $4.0 \times 10^{-3}$ |
| Hopfenberg       |                                         |                      | 3                    | 2                    | 3                    | 4                    | 3                    |                      |                      |                      |                      |
|                  | $R^2$                                   | <b>0.9905</b>        | 0.9875               | 0.9761               | 0.9848               | 0.8314               | 0.9416               | 0.9345               | <b>0.9406</b>        | <b>0.9916</b>        | <b>0.9923</b>        |
|                  | $k_{HB}$                                | $3.9 \times 10^{-5}$ | $1.0 \times 10^{-5}$ | $1.7 \times 10^{-5}$ | $1.2 \times 10^{-5}$ | $7.1 \times 10^{-5}$ | $3.2 \times 10^{-5}$ | $3.3 \times 10^{-5}$ | $5.6 \times 10^{-7}$ | $3.2 \times 10^{-5}$ | $1.0 \times 10^{-4}$ |
| Weibull          |                                         |                      | 5                    | 5                    | 5                    | 7                    | 5                    |                      |                      |                      |                      |
|                  | $R^2$                                   | <b>0.9972</b>        | <b>0.9980</b>        | <b>0.9908</b>        | <b>0.9976</b>        | <b>0.9986</b>        | <b>0.9907</b>        | 0.9799               | <b>0.9955</b>        | <b>0.9975</b>        | <b>0.9974</b>        |
|                  | $\alpha$                                | 19.484               | 26.822               | 8.989                | 24.183               | 5.101                | 7.630                | 17.555               | 15.263               | 10.707               | 43.009               |
|                  | $\beta$                                 | 0.71                 | 0.66                 | 0.59                 | 0.64                 | 0.19                 | 0.47                 | 0.41                 | 0.45                 | 0.72                 | 0.76                 |

|         |          |        |        |        |        |        |        |        |                      |                      |        |
|---------|----------|--------|--------|--------|--------|--------|--------|--------|----------------------|----------------------|--------|
| Makoid- | $R^2$    | 0.9963 | 0.9972 | 0.9942 | 0.9985 | 0.9990 | 0.9920 | 0.9902 | 0.9968               | 0.9989               | 0.9976 |
| Banakar | $k_{MB}$ | 3.946  | 2.681  | 12.493 | 4.571  | 6.346  | 11.413 | 6.866  | 9.982                | 10.898               | 2.596  |
|         | $n$      | 0.776  | 0.785  | 0.397  | 0.526  | 0.392  | 0.505  | 0.187  | 0.296                | 0.541                | 0.672  |
|         | $k$      | 0.008  | 0.009  | 0.007  | 0.004  | 0.001  | 0.010  | 0.017  | $1.1 \times 10^{-4}$ | $3.6 \times 10^{-4}$ | 0.002  |
| Peppas- | $R^2$    | 0.9975 | 0.9981 | 0.9940 | 0.9983 | 0.9991 | 0.9918 | 0.9826 | 0.9967               | 0.9989               | 0.9976 |
| Sahlin  | $k_1$    | 15.61  | 10.37  | 9.76   | 4.32   | 5.97   | 11.85  | 4.60   | 9.41                 | 10.97                | 0.55   |
|         | $k_2$    | 18.10  | 12.19  | 2.32   | 0.18   | 0.19   | 0.71   | 1.15   | 0.14                 | 0.01                 | 2.07   |
|         | $m$      | 0.21   | 0.21   | 0.35   | 0.52   | 0.45   | 0.55   | 0.29   | 0.30                 | 0.54                 | 0.37   |

### Zero-order $F=k_0 \cdot t$

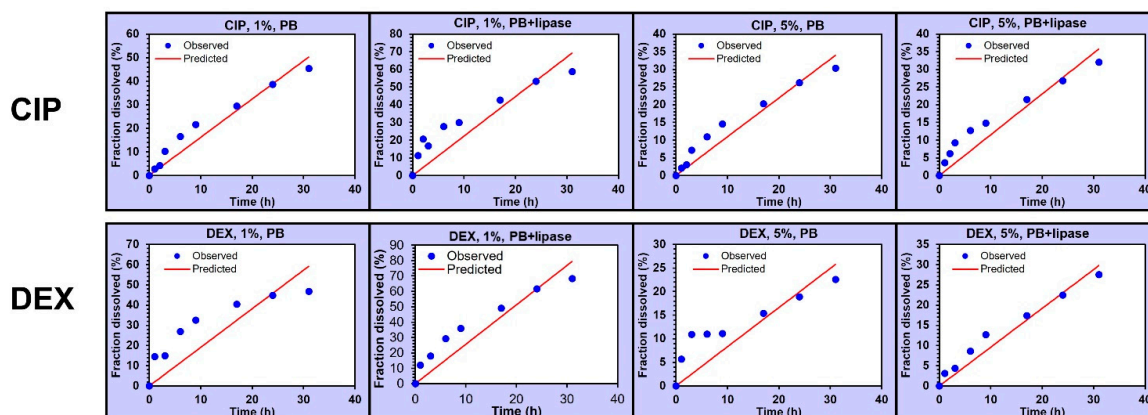

### First-order $F=100 \cdot [1 - \exp(-k_1 \cdot t)]$

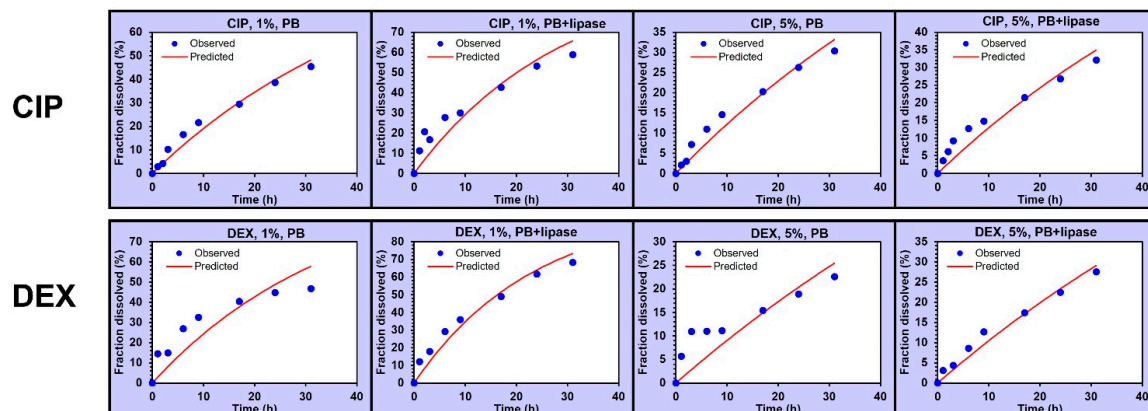

Higuchi

$$F = k_H \cdot t^{0.5}$$

CIP

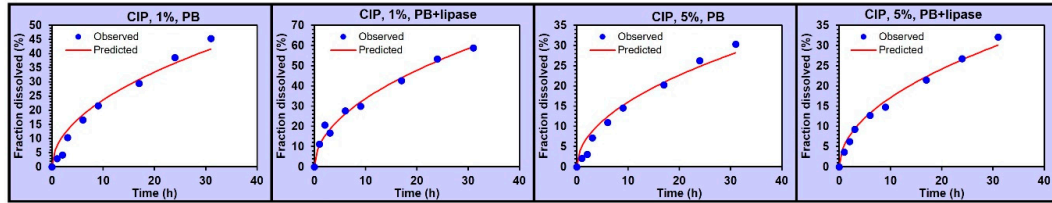

DEX

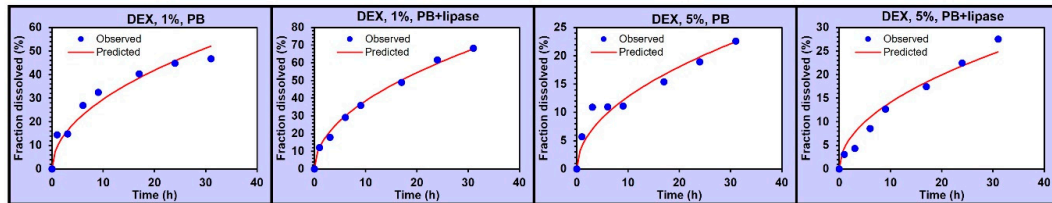

Korsmeyer-Peppas

$$F = k_{KP} \cdot t^n$$

CIP

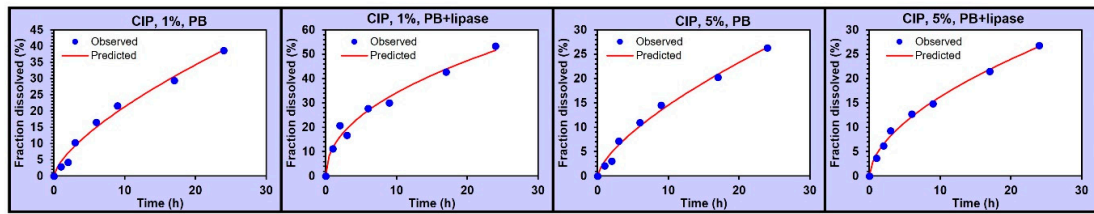

DEX

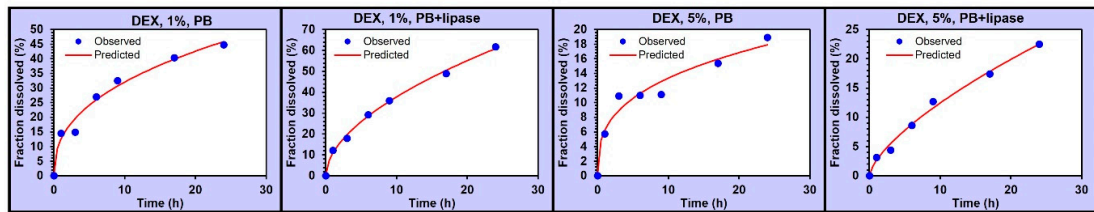

Hixon-Crowell

$$F = 100 \cdot [1 - (1 - k_{HC} \cdot t)^3]$$

CIP

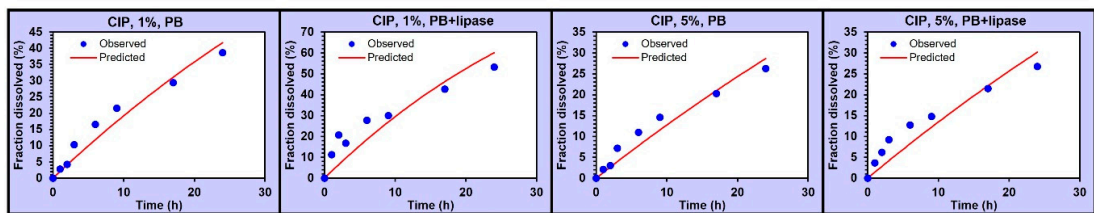

DEX

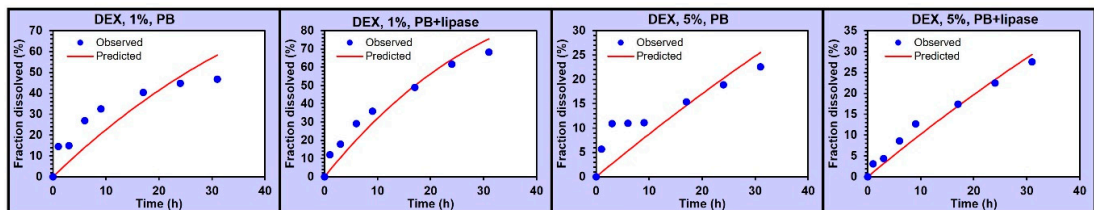



## Hopfenberg

$$F=100*[1-(1-k_{HB} *t)^n]$$

CIP

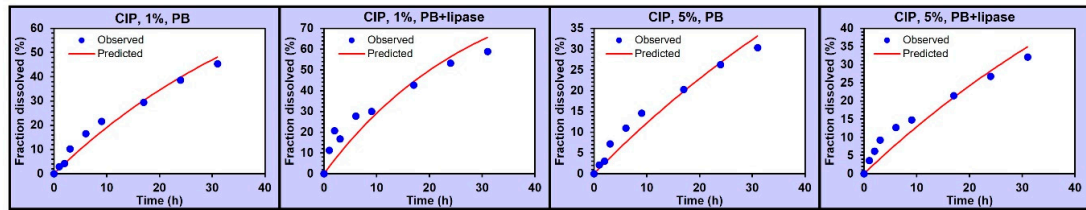

DEX

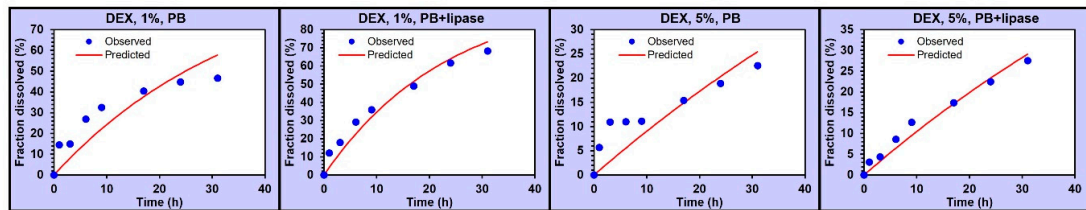

## Weibull

$$F=100*\{1-Exp[-((t-Ti)^{\beta}/\alpha)]\}$$

CIP

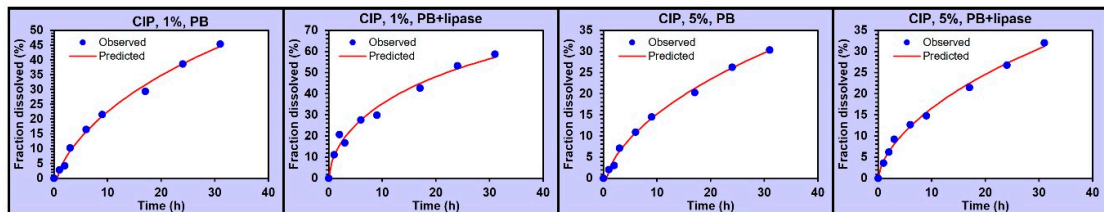

DEX

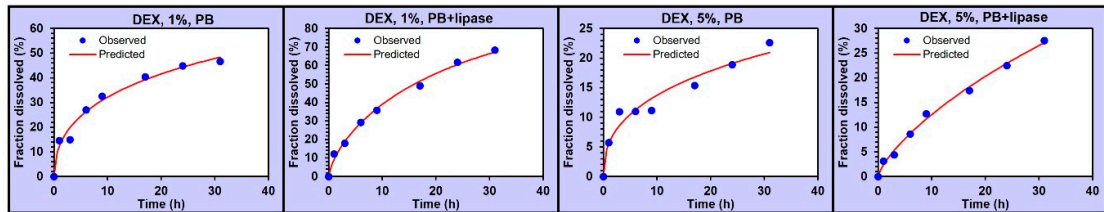

## Makoid-Banakar

$$F=k_{MB} *t^n*Exp(-k*t)$$

CIP

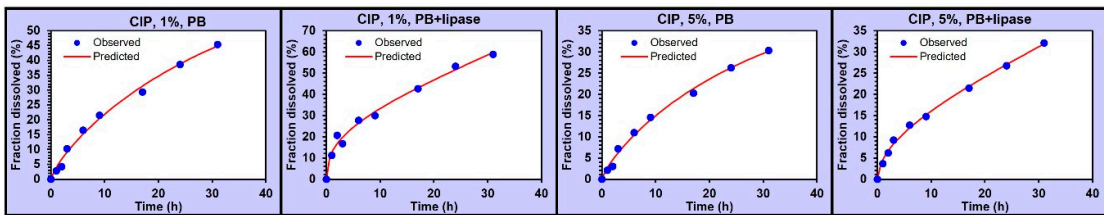

DEX

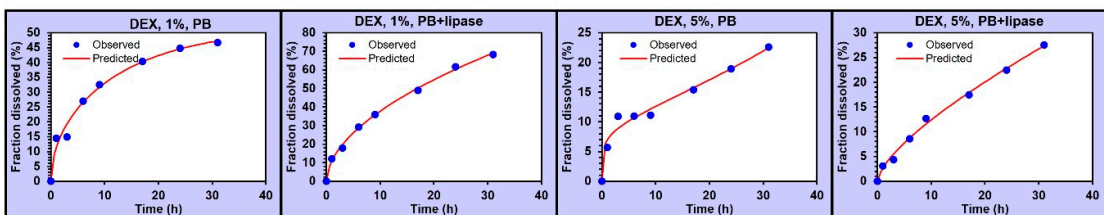

## Peppas-Sahlin

$$F = K_1 \cdot t^m + K_2 \cdot t^{(2 \cdot m)}$$

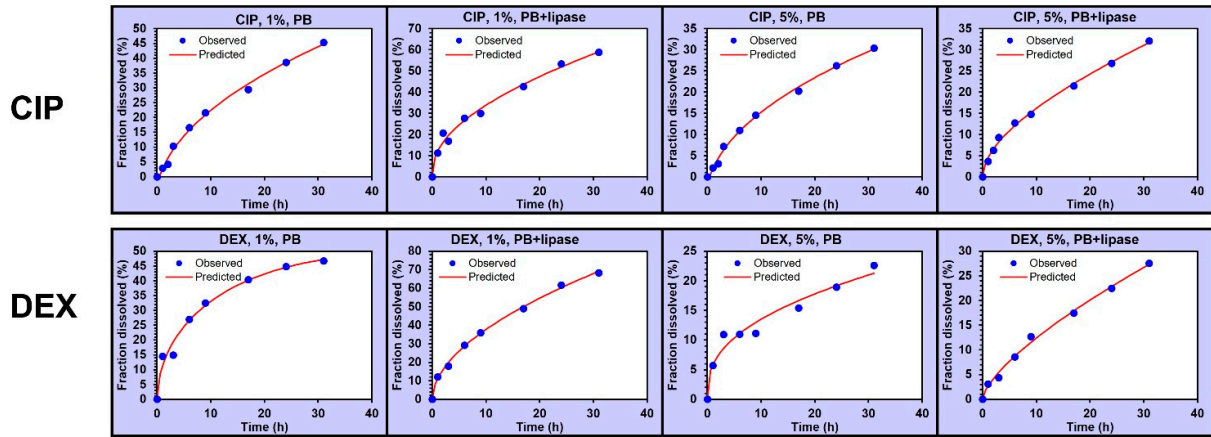

**Figure S4.** Regression curves obtained with different dissolution mathematical models of release.

**Table S2.** Viability of THP-1 cells after 24 h *in vitro* co-cultivation with different concentrations of dexamethasone (DEX). Data are presented as mean  $\pm$  SD ( $n \geq 9$ ); the data are shown as the percentages of viable cells.

| Series              | Cell viability (%)             |                      |                     |                             |                      |                      |
|---------------------|--------------------------------|----------------------|---------------------|-----------------------------|----------------------|----------------------|
|                     | without TNF $\alpha$ treatment |                      |                     | with TNF $\alpha$ treatment |                      |                      |
|                     | Viable                         | early Ap             | late Ap/Necrosis    | Viable                      | early Ap             | late Ap/Necrosis     |
| Negative control    | 94.43 $\pm$ 0.21               | 4.36 $\pm$ 0.24      | 1.06 $\pm$ 0.07     | 94.09 $\pm$ 0.41            | 4.10 $\pm$ 0.37      | 1.61 $\pm$ 0.12      |
| DEX, 5 $\mu$ g/mL   | 94.82 $\pm$ 0.20               | 4.19 $\pm$ 0.23      | 0.87 $\pm$ 0.06     | 92.16 $\pm$ 0.27 **         | 5.47 $\pm$ 0.22 *    | 2.12 $\pm$ 0.12 *    |
| DEX, 10 $\mu$ g/mL  | 94.75 $\pm$ 0.25               | 3.77 $\pm$ 0.29      | 1.07 $\pm$ 0.09     | 90.06 $\pm$ 1.12 ***        | 6.86 $\pm$ 0.74 **   | 2.70 $\pm$ 0.41      |
| DEX, 20 $\mu$ g/mL  | 93.81 $\pm$ 0.26               | 4.55 $\pm$ 0.20      | 1.41 $\pm$ 0.14*    | 83.13 $\pm$ 1.28 ***        | 11.71 $\pm$ 1.08 *** | 4.64 $\pm$ 0.45 ***  |
| DEX, 30 $\mu$ g/mL  | 93.60 $\pm$ 0.33               | 4.49 $\pm$ 0.30      | 1.63 $\pm$ 0.12 *** | 83.51 $\pm$ 1.39 ***        | 11.49 $\pm$ 0.98 *** | 4.50 $\pm$ 0.52 ***  |
| DEX, 50 $\mu$ g/mL  | 94.96 $\pm$ 0.31               | 3.13 $\pm$ 0.22 **   | 1.90 $\pm$ 0.21 **  | 85.34 $\pm$ 1.08 ***        | 11.45 $\pm$ 1.00 *** | 3.021 $\pm$ 0.12 *** |
| DEX, 100 $\mu$ g/mL | 86.73 $\pm$ 0.87 ***           | 11.46 $\pm$ 0.81 *** | 1.81 $\pm$ 0.07 **  | 59.41 $\pm$ 1.79 ***        | 33.78 $\pm$ 1.69 *** | 6.81 $\pm$ 0.19 ***  |

\*, \*\*, \*\*\* – the difference with negative control (THP-1 cell without dexamethasone) were significant with  $p < 0.05$ ,  $p < 0.01$  and  $p < 0.001$  according to non-parametrical Mann–Whitney U test; ‘Viable’ – YO-PRO-1–PI– cells; ‘early Ap’ – THP-1 cell in early steps of apoptosis with YO-PRO-1+PI– phenotype; ‘late Ap/Necrosis’ – dead THP-1 cells with YO-PRO-1+PI+ phenotype.

**Table S3.** CD54 expression by THP-1 cells in response to *in vitro* stimulation with different concentrations of dexamethasone. Data are presented as mean  $\pm$  SD ( $n \geq 9$ ); the data are shown as CD54 MFI.

| Series              | CD54 expression (MFI)      |                             |
|---------------------|----------------------------|-----------------------------|
|                     | w/o TNF $\alpha$ treatment | with TNF $\alpha$ treatment |
| Negative control    | 0.773 $\pm$ 0.084          | 5,397 $\pm$ 1,008           |
| DEX, 5 $\mu$ g/mL   | 0.718 $\pm$ 0.027          | 2.489 $\pm$ 0.489 **        |
| DEX, 10 $\mu$ g/mL  | 0.744 $\pm$ 0.031          | 2.083 $\pm$ 0.253 *         |
| DEX, 20 $\mu$ g/mL  | 0.855 $\pm$ 0,043          | 2.237 $\pm$ 0.097 *         |
| DEX, 25 $\mu$ g/mL  | 1.022 $\pm$ 0.068 *        | 2.398 $\pm$ 0.218 *         |
| DEX, 30 $\mu$ g/mL  | 0.852 $\pm$ 0.066          | 1.998 $\pm$ 0.075 **        |
| DEX, 50 $\mu$ g/mL  | 0.792 $\pm$ 0.029          | 1.696 $\pm$ 0.082 ***       |
| DEX, 100 $\mu$ g/mL | 0.852 $\pm$ 0.033          | 1.403 $\pm$ 0.085 ***       |

\*, \*\* – the difference with negative control (THP-1 cell without dexamethasone) were significant with  $p < 0.05$  and  $p < 0.01$  according to non-parametrical Mann–Whitney U test.
